# Supplementary material for: miR-218 Inhibits Erythroid Differentiation and Alters Iron Metabolism by Targeting ALAS2 in K562 Cells
Source: PubMed Central journal article supplement (PMC4691035; doi:10.3390/ijms161226088), 2015-11-26
Supplement: ijms-16-26088-s001.pdf [file ijms-16-26088-s001.pdf]

# Supplemental Materials: miR-218 Inhibits Erythroid Differentiation and Alters Iron Metabolism by Targeting *ALAS2* in K562 Cells

Yanming Li, Shuge Liu, Hongying Sun, Yadong Yang, Heyuan Qi, Nan Ding, Jiawen Zheng, Xunong Dong, Hongzhu Qu, Zhaojun Zhang and Xiangdong Fang

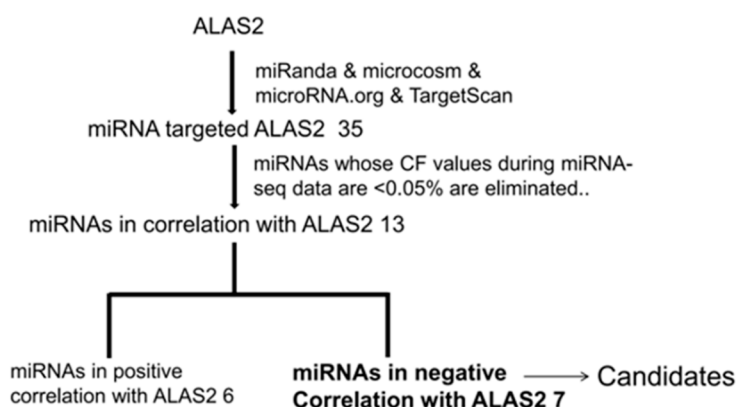

**Figure S1.** Methodology of screening candidate miRNAs.

**Table S1.** Expression (CF) pattern of miRNAs which may targeting *ALAS2* with inverse correlation with *ALAS2*.

| miRNA           | HESC    | ESER                   | FLER                   | PBER  |
|-----------------|---------|------------------------|------------------------|-------|
| hsa-miR-124     | 75.226  | 0.147                  | $3.074 \times 10^{-4}$ | 0.032 |
| hsa-miR-206     | 0.500   | $9.198 \times 10^{-4}$ | $2.043 \times 10^{-6}$ | 0     |
| hsa-miR-218     | 0.051   | $1.004 \times 10^{-4}$ | $2.101 \times 10^{-7}$ | 0     |
| hsa-miR-222     | 119.028 | 0.232                  | $4.864 \times 10^{-4}$ | 4.200 |
| hsa-miR-330-3p  | 13.583  | 0.026                  | $5.551 \times 10^{-5}$ | 5.818 |
| hsa-miR-342-5p  | 0.288   | $5.627 \times 10^{-4}$ | $1.178 \times 10^{-6}$ | 0.243 |
| hsa-miR-518d-5p | 0.081   | $1.579 \times 10^{-4}$ | $3.310 \times 10^{-7}$ | 0     |

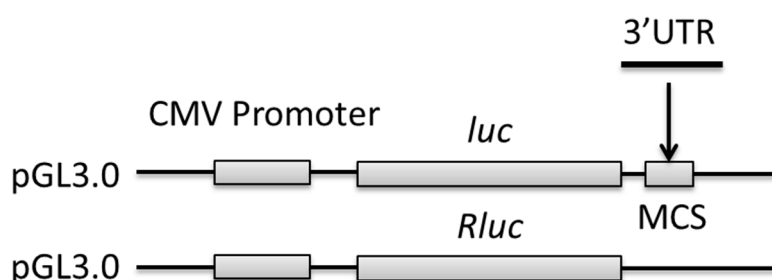

**Figure S2.** Vectors applied in dual-luciferase reporter assay.

**Table S2.** Primers sequences for ampification of primary miRNAs.

| <b>Traget</b> | <b>Primer Sequence (5'-3')</b>                                            |
|---------------|---------------------------------------------------------------------------|
| Pri-miR-124   | GGGCTCGAGCTGTAAATGGCATGGAGATATA<br>GGGGCGGCCGCGGAGATTTGCCTGCGGATTT        |
| Pri-miR-206   | GGGCTCGAGCTGCCATTCTCACAACAGA<br>GGGGCGGCCGCTGAGGGAGTCATTTGCTG             |
| Pri-miR-218   | GGGCTCGAGCAGTTCTGAGGAATGGTGGA<br>GGG GCGGCCGCTCTAGCCTACTTCACAGCTA         |
| Pri-miR-222   | GGGCTCGAGAGCCCCAGCTGATAATGTTGGACT<br>GGGGCGGCCGCATGTCACTCAGTCAGTATCTGTTGG |
| Pri-miR-330   | GGGCTCGAGCCACTCACCCACACTGAAGA<br>GGGGCGGCCGCGTTTTCTCCCTCTGCTTGACG         |
| Pri-miR-342   | GGGCTCGAGGGGCAGGTGCTGTTTCTGT<br>GGGGCGGCCGCTCACAGATGGCGAAACTGAG           |
| Pri-miR-518   | GGGCTCGAGAAAACAGGCAAACAGGACCA<br>GGGGCGGCCGCGCACAGAACCCCGATATCAT          |

**Table S3.** Primers for ampification of 3'UTR or mutated 3'UTR.

| <b>Traget</b>  | <b>Primer Sequence (5'-3')</b>                                                                                                                                         |
|----------------|------------------------------------------------------------------------------------------------------------------------------------------------------------------------|
| VIM-3'UTR      | GGGGCTAGCCAGCATCACGATGACCTT<br>GGGCTCGAGGAAGTGAGGTCTATCAAAAATG                                                                                                         |
| ALAS2-3'UTR    | GGGCTCGAGCATGCTGTGGTTTGTGCTTT<br>GGGGCTAGCGTATGTCACCACCTATGCCT                                                                                                         |
| ALAS2-3'UTR-M1 | GTGCCTCTAGCTGAATTGAGCCTAAAAATACTCCACAAACCACAGCATG<br>CATGCTGTGGTTTGTGGAGTATTTTTAGGCTCAATTCAGCTAGAGGCAC                                                                 |
| ALAS2-3'UTR-M2 | CCTCTAGCTGAATTGAGCCTAAAAATAAAGCAGCCACCACAGCATGTGAAGC<br>GCTTCACATGCTGTGGTGCCTGCTTTATTTTTAGGCTCAATTCAGCTAGAGG                                                           |
| ALAS2-3'UTR-M4 | TCTTCTGCTTTGTTGTGTGCCTCTAGCTGAATTGAGCCTA<br>AAAATAGGATGTGAACCACAGCATGTGAAGCCTTTTA<br>TAAAAGGCTTCACATGCTGTGGTTCACATCCTATTTTTAG<br>GCTCAATTCAGCTAGAGGCACACAACAAAGCAGAAGA |

**Table S4.** Primer sequences of quantitative real-time PCR.

| <b>Traget</b>      | <b>Primer Sequence (5'-3')</b>                          |
|--------------------|---------------------------------------------------------|
| <i>GAPDH</i>       | TGTTGCCATCAATGACCCCTT<br>CTCCACGACGTACTIONCAGCG         |
| <i>β-actin</i>     | ATAGCACAGCCTGGATAGCAACGTAC<br>CACCTTCTACAATGAGCTGCGTGTG |
| <i>ALAS2</i>       | CTACCCAAGGACCAAACCTGTTC<br>TGCCTTCTGCACAATCTTGCT        |
| <i>IRP2</i>        | TCGATGTATCTAAACTTGGCACC<br>GCCATCACAATTCGTACAGCAG       |
| <i>Ferritin</i>    | CAGCCTGGTCAATTTGTACCT<br>GCCAATTCGCGGAAGAAGTG           |
| <i>TFR1</i>        | ACCATTGTATATACCCGGTTC<br>CAATAGCCCAAGTAGCCAATCAT        |
| <i>Transferrin</i> | GGTGGCAGAGTTCTATGGGTC<br>ACAGTAAAGTAAGCCTATGGGGA        |
| <i>HBA1</i>        | CAGGAACTTGTCCAGGGAGG<br>GGACCCGGTCAACTTCAA              |
| <i>HBZ</i>         | AGTGCGGGAAGTAGGTCTTG<br>TGACCAAGACTGAGAGGACCA           |
| <i>HBE</i>         | GGTGCATTTTACTGCTGAGGA<br>CCCATGCATTGAGAACCAA            |
| <i>HBG</i>         | GCCATGGGTCATTTACAG<br>TGGTCACCAGAGCCTACCTT              |
| <i>HBB</i>         | ATCAGAAAGTGGTGGCTGGT<br>GATGCTCAAGGCCCTTCATA            |
| <i>GATA-1</i>      | CCAGACGACCACCACGACA<br>TCCTTCGGCTGCTCCTGTG              |
| <i>KLF1</i>        | TTGCGGCAAGAGCTACACC<br>GTCAGAGCGCGAAAAAGCAC             |
